# Supplementary material
Source: Springer Nature journal article supplement (https://www.springermedizin.de/resource/supplementary/12875_2010_519_MOESM4_ESM.pdf/9434782)

Copyright © 2006 Icek Ajzen

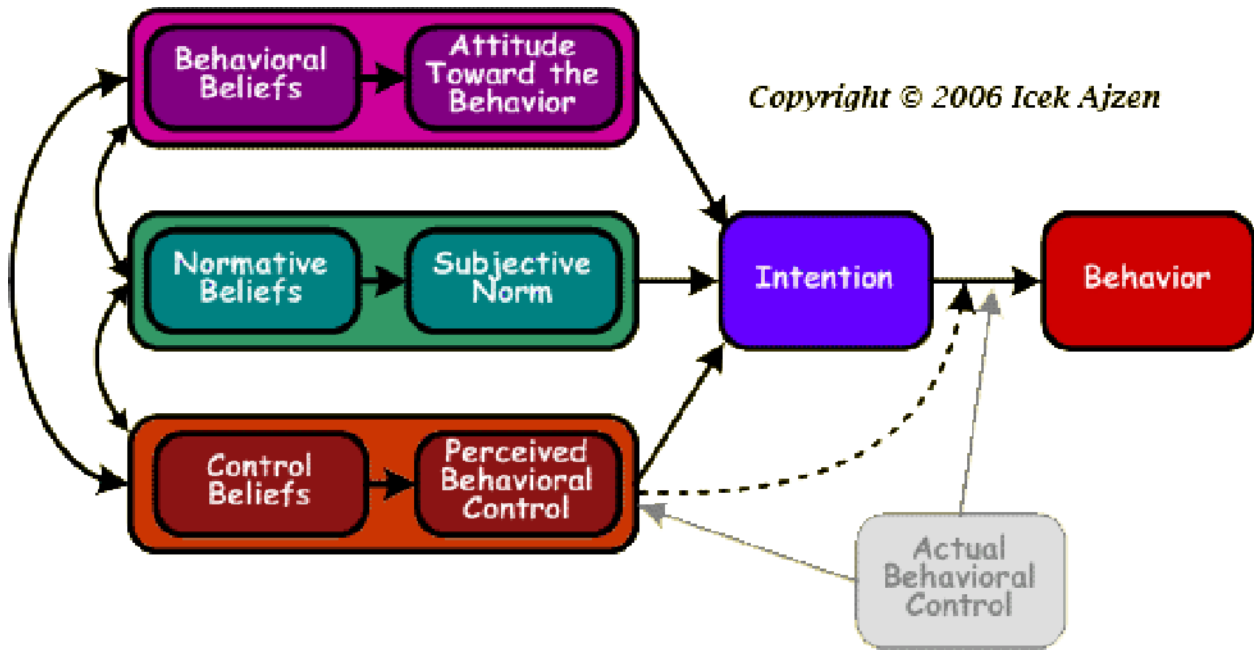

Supplement: MOESM4 [file 9434782]
